# Supplementary material
Source: publisher figshare collection journal article supplement (https://acs.figshare.com/ndownloader/files/6452511)
Supplement: Supplementary file 1 [file 6452511]

# SUPPORTING INFORMATION

## The Effect of Polar Fluctuation and Lattice Mismatch on Carrier Mobility at Oxide Interfaces

*Zhen Huang,<sup>†,‡</sup> Kun Han,<sup>†,‡</sup> Shengwei Zeng,<sup>†,‡</sup> Mallikarjuna Motapothula,<sup>†,‡</sup> Albina Y.*

*Borisevich,<sup>§,||,⊥</sup> Saurabh Ghosh,<sup>§,#</sup> Weiming Lü,<sup>□</sup> Changjian Li,<sup>†</sup> Wenxiong Zhou,<sup>†,‡</sup> Zhiqi Liu,<sup>■</sup>*

*Michael Coey,<sup>†,°</sup> Thirumalai Venkatesan,<sup>\*,†,‡,•,△,▲</sup> and Ariando<sup>\*,†,‡,▲</sup>*

<sup>†</sup>NUSNNI-NanoCore, National University of Singapore, 117411 Singapore

<sup>‡</sup>Department of Physics, National University of Singapore, 117542 Singapore

<sup>§</sup>Materials Science and Technology Division, <sup>||</sup>Institute for Functional Imaging of Materials,

and <sup>⊥</sup>The Center for Nanophase Materials Sciences, Oak Ridge National Laboratory, Oak Ridge, Tennessee 37831, United States

<sup>#</sup>Department of Physics and Astronomy, Vanderbilt University, Nashville, Tennessee 37235, United States

<sup>□</sup>Condensed Matter Science and Technology Institute, School of Science, Harbin Institute of Technology, Harbin 150081, P.R. China

<sup>■</sup>Department of Materials Science and Engineering, University of California, Berkeley, California 94720, United States

<sup>°</sup>School of Physics and CRANN, Trinity College, Dublin 2, Ireland

<sup>•</sup>Department of Electrical and Computer Engineering, National University of Singapore, 117576 Singapore

<sup>△</sup>Department of Materials Science and Engineering, National University of Singapore,

Singapore 117575, Singapore

<sup>▲</sup>National University of Singapore Graduate School for Integrative Sciences and Engineering

(NGS), 28 Medical Drive, Singapore 117456, Singapore

Zhen Huang and Kun Han contributed equally to this work.

\*E-mail: [venky@nus.edu.sg](mailto:venky@nus.edu.sg)    \*E-mail: [ariando@nus.edu.sg](mailto:ariando@nus.edu.sg)

**FIGURE S1**

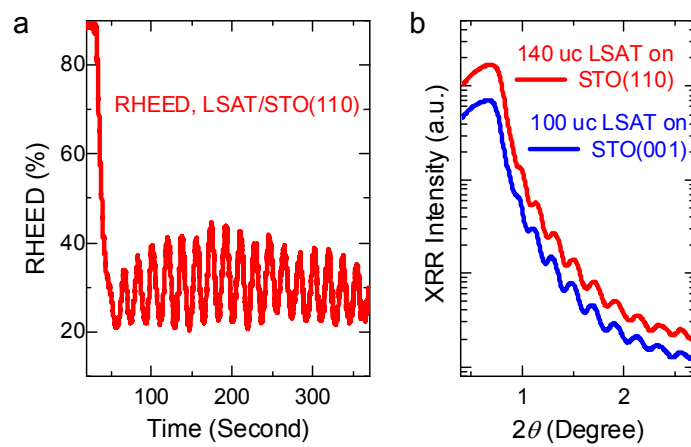

Figure S1 Oscillation and thickness in (001)- and (110)-orientated LSAT/STO films. (a) *In-situ* RHEED oscillations for (110)-orientated LSAT/STO interface. (b) XRR for 100 uc (001) and 140 uc (110) orientated LSAT/STO films. The thickness can be calculated to be 38 nm. Hence, one RHEED oscillation is about 0.38 nm for LSAT/STO (001), and 0.27 nm for LSAT/STO (110) films.

**FIGURE S2**

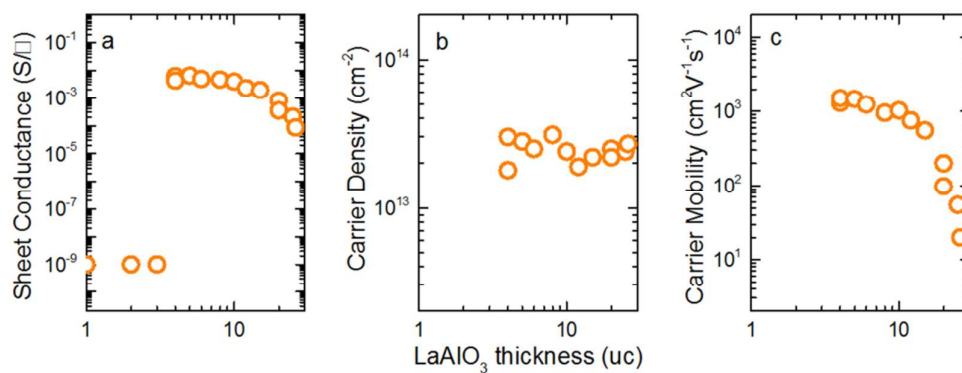

Figure S2 (a) Sheet conductance, (b) carrier density, and (c) carrier mobility of (001) LAO/STO interfaces are shown as a function of LAO thickness at 2 K.

**FIGURE S3**

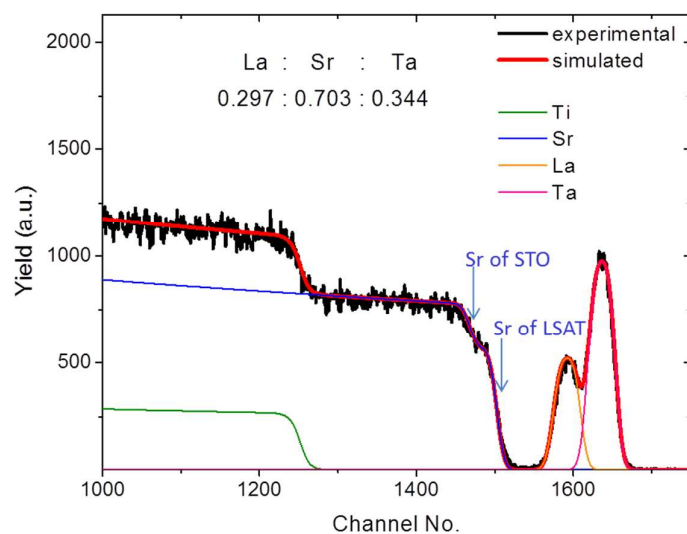

Figure S3 Chemical composition for LSAT/STO (001) sample. By fitting experimental RBS data of 100 uc LSAT/STO (001) sample, the chemical ratio of La: Sr: Ta can be obtained as  $0.297 \pm 0.015$  :  $0.703 \pm 0.035$  :  $0.344 \pm 0.017$ , which is very close to the bulk value with 0.3:0.7:0.35. The Sr from STO and LSAT is denoted by arrows respectively.

**FIGURE S4**

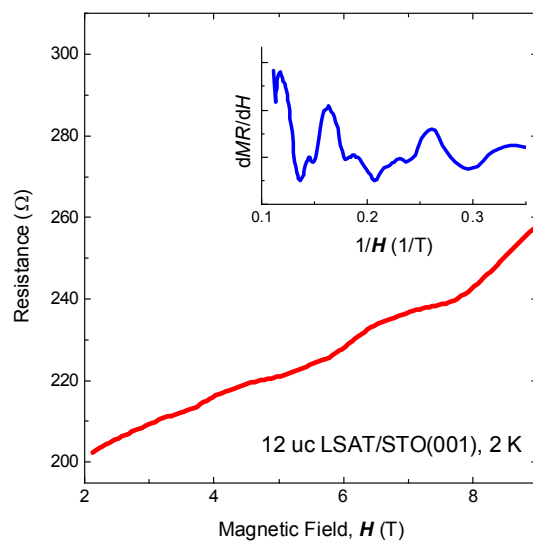

Figure S4 Shubnikov-de Haas conductance oscillations for annealed 12 uc LSAT/STO (001) interface.

**FIGURE S5**

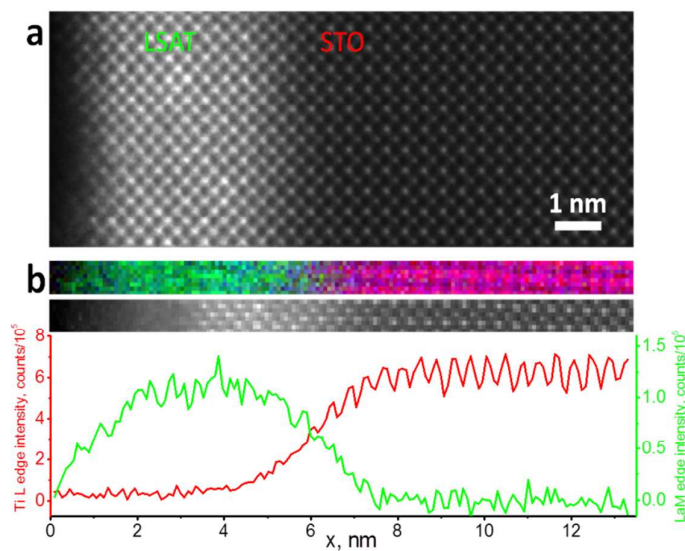

Figure S5 HAADF STEM and EELS studies of the films. (a) HAADF STEM image of the LSAT/STO thin film. (b) an EELS spectrum image acquired from a similar region of the film. From the top in (b): composite chemical map, where La M edge is represented by green, Ti L – red, and O K – blue color, respectively; simultaneously acquired HAADF signal; line profiles of La and Ti edges across the interface. Note that the top of the LSAT film is not crystalline due to rapid beam-induced amorphization.

## NOTE S1

### Experimental Methods:

**Sample Growth.** Pulsed laser deposition (PLD) with *in-situ* reflection high-energy electron diffraction (RHEED) was used to fabricate the samples. The STO substrates were treated with HF and annealed to obtain atomically-flat surfaces, and the single crystal LSAT is used for PLD target. The growth parameters for crystalline interface samples were as follows:  $1.8 \text{ J/cm}^2$  for laser energy,  $800^\circ\text{C}$  for the deposition temperature, and  $2 \times 10^{-3}$  Torr for oxygen partial pressure. The *ex-situ* annealing was performed at  $600^\circ\text{C}$  in 1 bar oxygen for 1 hour.

**Surface, Interface, and Crystal Structure.** The surfaces of the samples were examined by atomic force microscopy (AFM) using Agilent 5500. The interface and crystal structure of the samples were characterized by X-Ray Reflectivity (XRR), X-Ray Diffraction (XRD), and Reciprocal Space Mapping (RSM) using  $\text{CuK}\alpha_1$  radiation ( $\lambda = 1.5406 \text{ \AA}$ , Bruker D8 Discover).

**Electrical Measurements.** The sheet resistance, carrier densities and carrier mobility are measured by Van der Pauw method on a 9 T Physical Property Measurement System (PPMS, Quantum Design).



## NOTE S2

### Calculation of LSAT (001) Polarization:

For the  $i^{\text{th}}$  LSAT layer, the electric dipole moment  $\mathbf{p}_i$  can be characterized by

$$\mathbf{p}_{\mu,i} = 0.65(\mathbf{P}_0 V) + 0.35(-\mathbf{P}_0 V) = 0.3\mathbf{P}_0 V ;$$

$$\sigma_{p,i}^2 = 0.65[(\mathbf{P}_0 V)^2 - \mathbf{p}_{\mu,i}^2] + 0.35[(-\mathbf{P}_0 V)^2 - \mathbf{p}_{\mu,i}^2] = 0.91(\mathbf{P}_0 V)^2 ,$$

where  $\mathbf{p}_{\mu,i}$  is the mean value of  $\mathbf{p}_i$ , and  $\sigma_{p,i}^2$  is the variance of  $\mathbf{p}_i$ .

If there are  $t$  layers of LSAT, the total dipole moment  $\mathbf{p}$  can be characterized by

$$\mathbf{p}_{\mu} = t\mathbf{p}_{\mu,i} = 0.3t\mathbf{P}_0 V ;$$

$$\sigma_p^2 = t\sigma_{p,i}^2 = 0.91t(\mathbf{P}_0 V)^2 ,$$

where  $\mathbf{p}_{\mu}$  is the mean value of  $\mathbf{p}$ , and  $\sigma_p^2$  is the variance of  $\mathbf{p}$ .

For  $t$  layers of LSAT, the total volume is  $tV$ . Hence, the polarization  $\mathbf{P}$  is  $\mathbf{p}/(tV)$ .

So,  $\mathbf{P}$  can be characterized by

$$\mathbf{P}_{\mu} = \mathbf{p}_{\mu}/(tV) = 0.3\mathbf{P}_0 ;$$

$$\sigma_P^2 = (\sigma_p/tV)^2 = 0.91\mathbf{P}_0^2/t .$$
